# Supplementary material for: Benzoyl isothiocyanate modified surface of silica gel as the extraction material for adsorbing steroid hormones in water
Source: Royal Society of Chemistry journal article supplement (doi:10.1039/d2ay01852g), 2023-01-01
Supplement: d2ay01852g1.pdf [file d2ay01852g1.pdf]

## **Benzoyl Isothiocyanate Modified Surface of Silica Gel as Extraction Material for Adsorpting Steroid Hormones in Water**

Qiang Li <sup>1,2</sup>, Jia-Hui Zhao <sup>3</sup>, Hua-Jie Lai <sup>1,2,3,4\*</sup>, Bo Liu <sup>1,2,3,4</sup>, Miao Zhang <sup>1,2</sup>, Ning-Lan Xiao <sup>1,2</sup>, Hao-Dong Wang <sup>1,2</sup>, Tao Jin <sup>1,2,3,4,5,6\*</sup>

<sup>1</sup> Guangzhou Institute of Chemistry, Chinese Academy of Sciences, Guangzhou, 510650, China

<sup>2</sup> University of Chinese Academy of Sciences, Beijing, 100049, China

<sup>3</sup> CAS Testing Technical Services (Guangzhou) Co. Ltd., Guangzhou 510650, China

<sup>4</sup> New Materials Research Institute of CASCHEM (Chongqing) Co. Ltd., Chongqing 400714, China

<sup>5</sup> CAS Engineering Laboratory for Special Fine Chemicals, Chinese Academy of Sciences, Guangzhou 510650, China

<sup>6</sup> Guangdong Provincial Key Laboratory of Organic Polymer Materials for Electronics, Guangzhou 510650, China

\* Corresponding Author: Dr. Hua-Jie Lai, E-mail: [laihuajie@gic.ac.cn](mailto:laihuajie@gic.ac.cn)

Dr. Tao Jin, Email: [jintao@gic.ac.cn](mailto:jintao@gic.ac.cn)

### **Contents:**

Figure S1

Tables S1-S4

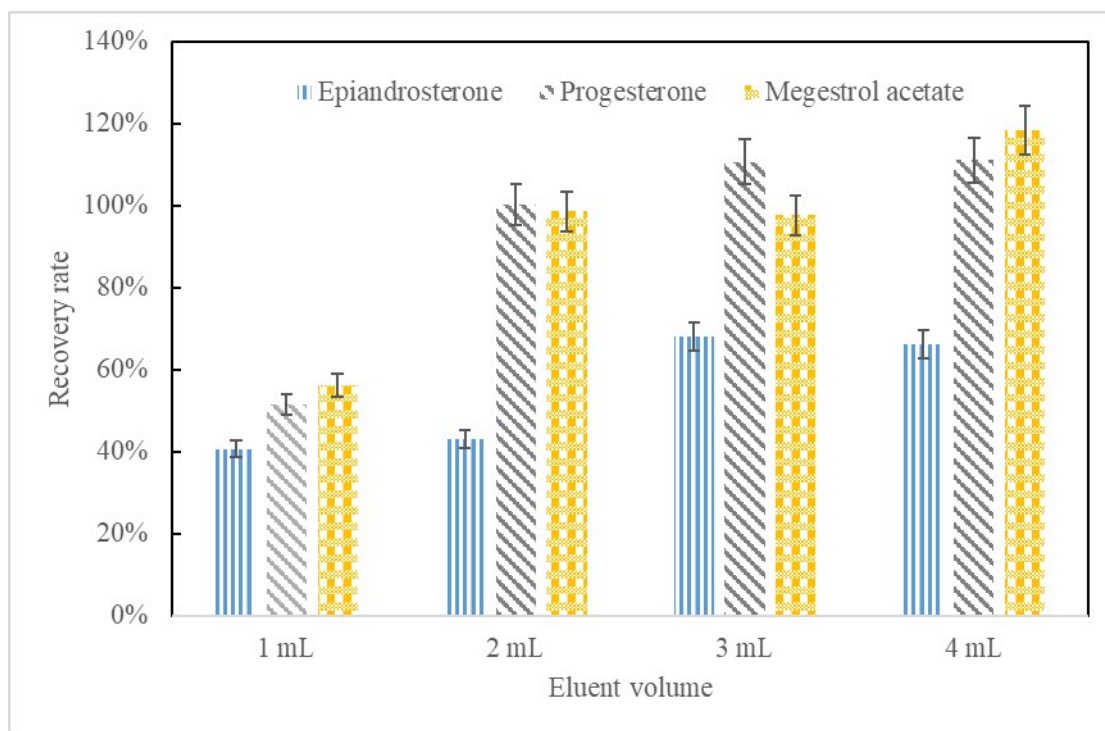

**Fig. S1.** Recovery rate of the modified silica gel for extraction of steroid hormones with different volume of eluent.

**TABLE S1** The gradient elution program for HPLC-MS/MS

| Gradient time/min | Mobile phase A/% | Mobile phase B/% |
|-------------------|------------------|------------------|
| 1.00              | 50               | 50               |
| 7.00              | 50               | 50               |
| 15.00             | 0                | 100              |
| 17.00             | 0                | 100              |
| 17.10             | 70               | 30               |
| 21.00             | Stop             |                  |

Mobile phase A: 0.1% formic acid in water; Mobile phase B: acetonitrile

**TABLE S2** Qualitative, quantitative ion and mass spectrometric parameters for steroid hormone drugs

| Steroid hormones  | Ionization mode | Precursor ion (m/z) | Product ions (m/z) | Q1 Pre (V) | CE   | Q3 Pre (V) | Retention time (min) |
|-------------------|-----------------|---------------------|--------------------|------------|------|------------|----------------------|
| Epiandrosterone   | ESI+            | 291.0               | 273.0              | 30.0       | 11.0 | 17.0       | 7.728                |
|                   |                 |                     | 255.0              | 12.0       | 17.0 | 25.0       |                      |
| Progesterone      | ESI+            | 315.2               | 97.2               | 11.0       | 23.0 | 16.0       | 10.737               |
|                   |                 |                     | 109.0              | 15.0       | 27.0 | 17.0       |                      |
| Megestrol acetate | ESI+            | 385.1               | 267.2              | 26.0       | 19.0 | 27.0       | 11.011               |
|                   |                 |                     | 325.2              | 13.0       | 16.0 | 21.0       |                      |

CE: capillary electrophoresis

**TABLE S3** Recovery ( $R_r$  (%)  $\pm$  SD(%), n=3) of 3 steroid hormones in the 5 cyclic extractions by the modified silica gel.

| Steroid hormones  | Cycle index     |                |                |                |                |
|-------------------|-----------------|----------------|----------------|----------------|----------------|
|                   | 1st             | 2nd            | 3rd            | 4th            | 5th            |
| Epiandrosterone   | 58.7 $\pm$ 4.3  | 56.0 $\pm$ 2.5 | 57.9 $\pm$ 3.4 | 55.5 $\pm$ 0.9 | 54.7 $\pm$ 1.3 |
| Progesterone      | 93.8 $\pm$ 2.5  | 88.7 $\pm$ 3.3 | 82.9 $\pm$ 4.9 | 81.1 $\pm$ 4.7 | 85.9 $\pm$ 6.5 |
| Megestrol acetate | 105.1 $\pm$ 5.5 | 82.0 $\pm$ 3.2 | 83.8 $\pm$ 2.2 | 81.8 $\pm$ 4.0 | 82.1 $\pm$ 5.5 |

**TABLE S4** Comparison of the presented extraction method with other published methods towards steroid hormones.

| Methods           | LOD/ $\mu\text{g}\cdot\text{L}^{-1}$ | Sample volume/mL | Compounds | $R_r/\%$  | Matrices | Ref.       |
|-------------------|--------------------------------------|------------------|-----------|-----------|----------|------------|
| SPE- GCxGC-TOF MS | 0.007-0.114                          | 5                | 25        | 70.0-123  | Water    | 1          |
| SPE- HPLC         | 0.25                                 | 15               | 1         | 97.4-99.2 | Beef     | 2          |
| SPDE-LC-MS/MS     | 0.5-3.4                              | 1000             | 15        | 75.6-101  | Water    | 3          |
| SPE-MEKC          | 1.15-1.59                            | 10               | 3         | 93.5-104  | Water    | 4          |
| MSPE-GC-T/MS      | 4-8                                  | 250              | 3         | 94.6-110  | Water    | 5          |
| SPE-HPLC-MS/MS    | 0.02-0.13                            | 5                | 3         | 54.7-112  | Water    | This study |

## REFERENCES

1. R. Stepan, P. Cuhra and S. Barsova, *Food Addit Contam A*, 2008, **25**, 557-565.
2. Y. R. Gong, Y. L. Niu, X. H. Gong, M. H. Ma, X. W. Ren, W. H. Zhu, R. M. Luo and B. L. Gong, *J Sep Sci*, 2015, **38**, 1254-1261.
3. L. Sun, W. Yong, X. G. Chu and J. M. Lin, *J Chromatogr A*, 2009, **1216**, 5416-5423.
4. F. K. Liu, *J Chromatogr A*, 2008, **1215**, 194-202.
5. R. A. Perez, B. Albero, J. L. Tadeo, E. Molero and C. Sanchez-Brunete, *Chromatographia*, 2014, **77**, 837-843.
